# Supplementary material
Source: PubMed Central journal article supplement (PMC5794511)
Supplement: NIHMS902948-supplement-supplement_1.pdf [file NIHMS902948-supplement-supplement_1.pdf]

Supplemental Table 1 – Differences in Symptom Occurrence Rates Among the Patient Subgroups Using Latent Class Analysis or K-Modes Analysis

| Symptom                 | Method  | All Low <sup>a,b</sup><br>(0) | Moderate<br>Physical & Lower<br>Psychological<br>(1) | Moderate<br>Physical & Higher<br>Psychological<br>(2) | All High<br>(3) | Statistics                                                        |
|-------------------------|---------|-------------------------------|------------------------------------------------------|-------------------------------------------------------|-----------------|-------------------------------------------------------------------|
| Physical Symptoms       |         |                               |                                                      |                                                       |                 |                                                                   |
| Lack of energy          | LCA     | 54.9                          | 98.7                                                 | 93.0                                                  | 99.4            | $X^2 = 357.44, p < .001$<br>0 < 1, 2, and 3<br>1 > 2; 2 < 3       |
|                         | K-Modes | 64.7                          | 95.6                                                 | 93.9                                                  | 97.4            | $X^2 = 221.00, p < .001$<br>0 < 1, 2, and 3                       |
| Difficult concentrating | LCA     | 18.1                          | 48.4                                                 | 69.0                                                  | 97.8            | $X^2 = 391.45, p < .001$<br>0 < 1 < 2 < 3                         |
|                         | K-Modes | 25.4                          | 36.1                                                 | 76.1                                                  | 86.7            | $X^2 = 386.45, p < .001$<br>0 < 1 < 2 < 3                         |
| Feeling drowsy          | LCA     | 24.3                          | 73.7                                                 | 70.7                                                  | 96.6            | $X^2 = 366.85, p < .001$<br>0 < 1, 2, and 3<br>1 and 2 < 3        |
|                         | K-Modes | 32.1                          | 71.2                                                 | 77.9                                                  | 86.0            | $X^2 = 309.61, p < .001$<br>0 < 1, 2, and 3<br>1 < 3              |
| Nausea                  | LCA     | 16.7                          | 63.9                                                 | 45.4                                                  | 95.5            | $X^2 = 358.73, p < .001$<br>0 < 1, 2, and 3<br>1 > 2; 1 and 2 < 3 |
|                         | K-Modes | 22.6                          | 77.6                                                 | 34.6                                                  | 82.5            | $X^2 = 377.42, p < .001$<br>0 < 1, 2, and 3<br>1 > 2; 2 < 3       |
| Pain                    | LCA     | 33.4                          | 70.3                                                 | 65.6                                                  | 94.4            | $X^2 = 231.14, p < .001$<br>0 < 1, 2, and 3<br>1 and 2 < 3        |
|                         | K-Modes | 36.0                          | 75.1                                                 | 71.1                                                  | 83.4            | $X^2 = 233.65, p < .001$<br>0 < 1, 2, and 3<br>2 < 3              |
| Difficulty sleeping     | LCA     | 45.8                          | 71.5                                                 | 80.5                                                  | 92.7            | $X^2 = 178.97, p < .001$<br>0 < 1 < 2 < 3                         |
|                         | K-Modes | 53.7                          | 69.3                                                 | 75.7                                                  | 89.6            | $X^2 = 125.66, p < .001$<br>0 < 1, 2, and 3<br>1 and 2 < 3        |
| Dry mouth               | LCA     | 21.2                          | 65.8                                                 | 36.8                                                  | 86.0            | $X^2 = 282.43, p < .001$<br>0 < 1, 2, and 3<br>1 > 2; 1 and 2 < 3 |
|                         | K-Modes | 26.1                          | 72.2                                                 | 31.4                                                  | 73.7            | $X^2 = 261.36, p < .001$<br>0 < 1 and 3<br>1 > 2; 2 < 3           |
| Lack of appetite        | LCA     | 14.1                          | 56.0                                                 | 39.2                                                  | 84.3            | $X^2 = 292.58, p < .001$                                          |

|                                 |         |      |      |      |      |                                                                   |
|---------------------------------|---------|------|------|------|------|-------------------------------------------------------------------|
|                                 |         |      |      |      |      | 0 < 1, 2, and 3<br>1 > 2; 1 and 2 < 3                             |
|                                 | K-Modes | 18.7 | 71.2 | 26.8 | 74.0 | $X^2 = 349.43, p < .001$<br>0 < 1 and 3<br>1 > 2; 2 < 3           |
| Change in the way food tastes   | LCA     | 27.4 | 63.3 | 46.2 | 83.7 | $X^2 = 190.76, p < .001$<br>0 < 1, 2, and 3<br>1 > 2; 1 and 2 < 3 |
|                                 | K-Modes | 32.3 | 70.7 | 32.5 | 80.2 | $X^2 = 249.04, p < .001$<br>0 < 1 and 3<br>1 > 2; 2 < 3           |
| Numbness/tingling in hands/feet | LCA     | 33.4 | 62.0 | 51.9 | 79.8 | $X^2 = 125.76, p < .001$<br>0 < 1, 2, and 3<br>1 > 2; 1 and 2 < 3 |
|                                 | K-Modes | 35.6 | 75.1 | 45.0 | 72.4 | $X^2 = 158.32, p < .001$<br>0 < 1 and 3<br>1 > 2; 2 < 3           |
| Hair loss                       | LCA     | 33.7 | 61.4 | 60.8 | 78.7 | $X^2 = 128.15, p < .001$<br>0 < 1, 2, and 3<br>1 and 2 < 3        |
|                                 | K-Modes | 34.0 | 69.8 | 64.6 | 72.1 | $X^2 = 160.60, p < .001$<br>0 < 1, 2, and 3                       |
| Constipation                    | LCA     | 21.5 | 47.5 | 47.6 | 78.7 | $X^2 = 177.03, p < .001$<br>0 < 1, 2, and 3<br>1 < 2 and 3        |
|                                 | K-Modes | 22.9 | 61.5 | 36.1 | 74.0 | $X^2 = 242.11, p < .001$<br>0 < 1, 2, and 3<br>1 > 2; 1 and 2 < 3 |
| Feeling bloated                 | LCA     | 10.3 | 28.8 | 40.4 | 77.5 | $X^2 = 269.93, p < .001$<br>0 < 1 < 2 < 3                         |
|                                 | K-Modes | 16.0 | 24.4 | 32.5 | 69.2 | $X^2 = 258.27, p < .001$<br>0 < 2 and 3<br>1 and 2 < 3            |
| Changes in skin                 | LCA     | 11.5 | 38.9 | 41.8 | 77.0 | $X^2 = 245.68, p < .001$<br>0 < 1, 2, and 3<br>1 and 2 < 3        |
|                                 | K-Modes | 16.4 | 35.6 | 36.1 | 71.4 | $X^2 = 256.15, p < .001$<br>0 < 1, 2, and 3<br>1 and 2 < 3        |
| Sweats                          | LCA     | 13.6 | 27.8 | 33.7 | 73.0 | $X^2 = 208.28, p < .001$<br>0 < 1, 2, and 3<br>1 and 2 < 3        |
|                                 | K-Modes | 17.5 | 21.0 | 26.4 | 66.2 | $X^2 = 235.56, p < .001$<br>0 < 2 and 3<br>1 and 2 < 3            |
| Dizziness                       | LCA     | 6.4  | 39.9 | 32.9 | 70.8 | $X^2 = 260.76, p < .001$                                          |

|                                           |         |      |      |      |      |                                                                  |
|-------------------------------------------|---------|------|------|------|------|------------------------------------------------------------------|
|                                           |         |      |      |      |      | 0 < 1, 2, and 3<br>1 and 2 < 3                                   |
|                                           | K-Modes | 9.3  | 56.6 | 23.6 | 59.7 | $X^2 = 304.91, p < .001$<br>0 < 1, 2, and 3<br>1 > 2; 2 < 3      |
| Hot flashes                               | LCA     | 16.7 | 33.5 | 29.3 | 70.2 | $X^2 = 166.73, p < .001$<br>0 < 1, 2, and 3<br>1 and 2 < 3       |
|                                           | K-Modes | 21.3 | 21.5 | 23.9 | 64.3 | $X^2 = 195.29, p < .001$<br>0, 1, and 2 < 3                      |
| Problems with sexual interest or activity | LCA     | 10.5 | 24.1 | 41.8 | 57.9 | $X^2 = 175.13, p < .001$<br>0 < 1 < 2 < 3                        |
|                                           | K-Modes | 13.2 | 25.9 | 30.7 | 60.7 | $X^2 = 212.26, p < .001$<br>0 < 1 and 3<br>1 and 2 < 3           |
| Cough                                     | LCA     | 18.4 | 40.5 | 30.5 | 56.7 | $X^2 = 95.62, p < .001$<br>0 < 1, 2, and 3<br>1 > 2; 1 and 2 < 3 |
|                                           | K-Modes | 22.4 | 31.7 | 28.2 | 54.9 | $X^2 = 97.52, p < .001$<br>0, 1, and 2 < 3                       |
| Diarrhea                                  | LCA     | 12.9 | 32.6 | 32.7 | 56.2 | $X^2 = 119.84, p < .001$<br>0 < 1, 2, and 3<br>1 and 2 < 3       |
|                                           | K-Modes | 16.8 | 38.5 | 32.9 | 42.9 | $X^2 = 77.50, p < .001$<br>0 < 1, 2, and 3                       |
| Psychological Symptoms                    |         |      |      |      |      |                                                                  |
| Worrying                                  | LCA     | 22.4 | 14.2 | 90.6 | 98.9 | $X^2 = 732.68, p < .001$<br>0 > 1<br>0 and 1 < 2 and 3; 2 < 3    |
|                                           | K-Modes | 24.3 | 27.8 | 81.1 | 90.3 | $X^2 = 488.89, p < .001$<br>0 and 1 < 2 and 3<br>2 < 3           |
| Feeling irritable                         | LCA     | 8.4  | 25.6 | 64.9 | 91.6 | $X^2 = 500.74, p < .001$<br>0 < 1 < 2 < 3                        |
|                                           | K-Modes | 13.8 | 22.4 | 65.7 | 79.5 | $X^2 = 451.86, p < .001$<br>0 < 2 < 3<br>1 < 2 and 3             |
| Feeling sad                               | LCA     | 14.3 | 16.1 | 81.3 | 91.6 | $X^2 = 639.54, p < .001$<br>0 and 1 < 2 and 3<br>2 < 3           |
|                                           | K-Modes | 15.7 | 25.9 | 81.1 | 80.5 | $X^2 = 518.29, p < .001$<br>0 < 1, 2, and 3<br>1 < 2 and 3       |
| Feeling nervous                           | LCA     | 9.5  | 18.4 | 60.6 | 87.1 | $X^2 = 467.74, p < .001$<br>0 < 1 < 2 < 3                        |
|                                           | K-Modes | 10.6 | 18.5 | 69.3 | 70.1 | $X^2 = 454.62, p < .001$                                         |

|                                                   |         |      |      |      |      |                                                                   |
|---------------------------------------------------|---------|------|------|------|------|-------------------------------------------------------------------|
|                                                   |         |      |      |      |      | 0 < 1, 2, and 3<br>1 < 2 and 3                                    |
| I don't look like myself                          | LCA     | 13.6 | 28.2 | 54.1 | 74.2 | $X^2 = 263.69, p < .001$<br>0 < 1 < 2 < 3                         |
|                                                   | K-Modes | 14.6 | 25.9 | 58.2 | 67.9 | $X^2 = 303.48, p < .001$<br>0 < 1, 2, and 3<br>1 < 2 and 3        |
| Symptoms Not Included Formation of Patient Groups |         |      |      |      |      |                                                                   |
| Difficulty swallowing                             | LCA     | 4.1  | 18.7 | 10.6 | 35.4 | $X^2 = 113.35, p < .001$<br>0 < 1, 2, and 3<br>1 > 2; 1 and 2 < 3 |
|                                                   | K-Modes | 4.7  | 21.5 | 8.2  | 29.5 | $X^2 = 119.48, p < .001$<br>0 < 1 and 3<br>1 > 2; 2 < 3           |
| Abdominal cramps                                  | LCA     | 8.1  | 21.5 | 21.9 | 59.6 | $X^2 = 190.13, p < .001$<br>0 < 1, 2, and 3<br>1 and 2 < 3        |
|                                                   | K-Modes | 10.3 | 22.4 | 20.7 | 45.5 | $X^2 = 139.63, p < .001$<br>0 < 1, 2, and 3<br>1 and 2 < 3        |
| Shortness of breath                               | LCA     | 10.3 | 30.1 | 28.1 | 57.3 | $X^2 = 144.71, p < .001$<br>0 < 1, 2, and 3<br>1 and 2 < 3        |
|                                                   | K-Modes | 14.4 | 30.7 | 28.2 | 44.8 | $X^2 = 94.90, p < .001$<br>0 < 1, 2, and 3<br>1 and 2 < 3         |
| Difficulty breathing                              | LCA     | 7.4  | 22.8 | 17.5 | 50.0 | $X^2 = 145.13, p < .001$<br>0 < 1, 2, and 3<br>1 and 2 < 3        |
|                                                   | K-Modes | 10.4 | 21.0 | 18.9 | 36.7 | $X^2 = 84.69, p < .001$<br>0 < 1, 2, and 3<br>1 and 2 < 3         |
| Chest tightness                                   | LCA     | 5.5  | 16.8 | 18.0 | 48.3 | $X^2 = 156.69, p < .001$<br>0 < 1, 2, and 3<br>1 and 2 < 3        |
|                                                   | K-Modes | 6.9  | 16.6 | 18.2 | 37.3 | $X^2 = 123.91, p < .001$<br>0 < 1, 2, and 3<br>1 and 2 < 3        |
| Itching                                           | LCA     | 12.2 | 29.1 | 24.8 | 47.2 | $X^2 = 86.76, p < .001$<br>0 < 1, 2, and 3<br>1 < 3               |
|                                                   | K-Modes | 14.6 | 27.3 | 24.3 | 41.6 | $X^2 = 77.24, p < .001$<br>0 < 1, 2, and 3<br>1 and 2 < 3         |
| Weight loss                                       | LCA     | 13.1 | 30.4 | 24.3 | 46.6 | $X^2 = 80.44, p < .001$<br>0 < 1, 2, and 3                        |

|                                  |         |      |      |      |      |                                                                        |
|----------------------------------|---------|------|------|------|------|------------------------------------------------------------------------|
|                                  |         |      |      |      |      | 1 and 2 < 3<br>$X^2 = 113.46, p < .001$<br>0 < 1 and 3<br>1 > 2; 2 < 3 |
|                                  | K-Modes | 14.2 | 40.0 | 17.1 | 41.9 |                                                                        |
| Increased appetite               | LCA     | 16.0 | 23.7 | 28.8 | 46.1 | $X^2 = 61.84, p < .001$<br>0 < 2 and 3<br>1 and 2 < 3                  |
|                                  | K-Modes | 18.3 | 22.4 | 25.4 | 41.9 | $X^2 = 58.54, p < .001$<br>0, 1 and 2 < 3                              |
| Mouth sores                      | LCA     | 9.1  | 21.8 | 24.3 | 39.3 | $X^2 = 75.02, p < .001$<br>0 < 1, 2, and 3<br>1 and 2 < 3              |
|                                  | K-Modes | 10.3 | 23.9 | 22.5 | 36.0 | $X^2 = 80.90, p < .001$<br>0 < 1, 2, and 3<br>1 and 2 < 3              |
| Problems with urination          | LCA     | 5.7  | 12.3 | 13.2 | 38.8 | $X^2 = 114.92, p < .001$<br>0 < 1, 2, and 3<br>1 and 2 < 3             |
|                                  | K-Modes | 6.9  | 12.2 | 11.8 | 29.9 | $X^2 = 88.17, p < .001$<br>0, 1, and 2 < 3                             |
| Weight gain                      | LCA     | 16.2 | 25.9 | 28.8 | 37.6 | $X^2 = 35.37, p < .001$<br>0 < 1, 2, and 3                             |
|                                  | K-Modes | 18.1 | 23.9 | 28.2 | 36.4 | $X^2 = 36.08, p < .001$<br>0 < 2 and 3<br>1 < 3                        |
| Vomiting                         | LCA     | 4.1  | 16.5 | 9.6  | 30.9 | $X^2 = 91.05, p < .001$<br>0 < 1, 2, and 3<br>1 > 2; 1 and 2 < 3       |
|                                  | K-Modes | 5.8  | 19.0 | 8.9  | 22.4 | $X^2 = 61.61, p < .001$<br>0 < 1 and 3<br>1 > 2; 2 < 3                 |
| Swelling in the arms and/or legs | LCA     | 7.6  | 17.1 | 14.7 | 26.4 | $X^2 = 37.76, p < .001$<br>0 < 1, 2, and 3<br>2 < 3                    |
|                                  | K-Modes | 8.8  | 16.1 | 15.0 | 23.4 | $X^2 = 34.06, p < .001$<br>0 < 1 and 3                                 |

Abbreviations: LCA = latent class analysis

<sup>a</sup>For LCA – All Low (n=419, 31.5%), Moderate Physical and Lower Psychological (n=316, 23.8%), Moderate Physical and Higher Psychological (n=416, 31.3%) and All High (n=178, 13.4%).

<sup>b</sup>For K-modes analysis – All Low (n=536, 40.3%), Moderate Physical and Lower Psychological (n=205, 15.4%), Moderate Physical and Higher Psychological (n=280, 21.13%) and All High (n=303, 23.24%).
